# Supplementary material
Source: publisher figshare collection journal article supplement (https://karger.figshare.com/ndownloader/files/14478494)
Supplement: Supplementary file 1 [file 14478494]

**Supplemental Table 1.** Precuneal cluster size and corresponding MNI coordinates of location of maximum (in millimeter) after between-group analysis with AD > HCs and MCI-AD > HCs contrasts (p < 0.05, FWE-corrected).

| Cluster | Location of maximum (MNI) | | | Anatomical structures | % of cluster | Number of voxels | t- statistics | Z score |
| --- | --- | --- | --- | --- | --- | --- | --- | --- |
|  | x | y | z |  |  |  |  |  |
| AD > HCs | -2 | -64 | 30 | right precuneus | 44.4 | 813 | 8.9 | 5.8 |
|  |  |  |  | left precuneus | 6.15 |  |  |  |
| MCI > HCs | 4 | -64 | 32 | right precuneus | 27.5 | 29 | 8.77 | 5.14 |
|  |  |  |  | left precuneus | 3.45 |  |  |  |

Abbreviations: AD = Alzheimer's disease; FWE = family-wise error; HCs = healthy controls; MCI = mild cognitive impairment; MNI = Montreal Neurological Institute.

**Supplemental Table 2.** Cluster size, location of maximum (in millimeter) and corresponding anatomical structures in MNI space after voxel-wise regression analysis to depict the linear association between SUVr values and disease duration adjusted for the effect of age (p < .001, uncorrected, kE > 100 voxels).

| Cluster index | Location of maximum (MNI) | | | Anatomical structures | Number of voxels | t- statistics | Z score |
| --- | --- | --- | --- | --- | --- | --- | --- |
|  | x | y | z |  |  |  |  |
| 1 | 48 | 24 | -26 | R fusiform, inferior temporal, inferior orbitofrontal | 1379 | 5.83 | 4.68 |
| 2 | -52 | 34 | -14 | L-temporal pole, midle frontal and inferior temporal | 1252 | 7.27 | 5.4 |
| 3 | -28 | -72 | 58 | L superior and inferior parietal and angular | 274 | 5.4 | 4.44 |
| 4 | 16 | -96 | -8 | R cuneus, superior occipital and lingual | 274 | 4.65 | 3.97 |
| 5 | 20 | 68 | -14 | R frontal orbitomedial,  superior frontomedial | 158 | 4.48 | 3.86 |

Abbreviations: kE = extent threshold; L -= left; MNI = Montreal Neurological Institute; R= right; SUVr = standard uptake value ratio.
